# Supplementary material
Source: MDPI journal article supplement (https://www.mdpi.com/1424-2818/14/6/480)
Supplement: s1 [file s1]

## Supplementary Material

**Table S1.** Names and descriptions of variables used in the models.

| Variable | Description | Source |
|----------|-------------|--------|
|----------|-------------|--------|

### *Co-occurrence analyses.*

|                           |                                                                                                                                                                                                                                                                                                                                                                                                                                                                                                                                                                                                        |                               |
|---------------------------|--------------------------------------------------------------------------------------------------------------------------------------------------------------------------------------------------------------------------------------------------------------------------------------------------------------------------------------------------------------------------------------------------------------------------------------------------------------------------------------------------------------------------------------------------------------------------------------------------------|-------------------------------|
| <i>Zenaida Dove</i>       | Detection of <i>Zenaida Dove</i>                                                                                                                                                                                                                                                                                                                                                                                                                                                                                                                                                                       | This survey camera traps data |
| <i>Bridled Quail-Dove</i> | Detection of <i>Bridled Quail-Dove</i>                                                                                                                                                                                                                                                                                                                                                                                                                                                                                                                                                                 | This survey camera traps data |
| <i>Ruddy Quail-Dove</i>   | Detection of <i>Ruddy Quail-Dove</i>                                                                                                                                                                                                                                                                                                                                                                                                                                                                                                                                                                   | This survey camera traps data |
| <i>Birds</i>              | Among all birds detected:<br>Forest thrush ( <i>Turdus lherminieri</i> ), Green heron ( <i>Butorides virescens</i> ),<br>American yellow warbler ( <i>Setophaga petechia</i> ),<br>Carib grackle ( <i>Quiscalus lugubris</i> ),<br>Yellowcrowned Night Heron ( <i>Nyctanassa violacea</i> ), Gray kingbird ( <i>Tyrannus dominicensis</i> ),<br>Bananaquit ( <i>Coereba flaveola</i> ), Lesser Antillean bullfinch ( <i>Loxigilla noctis</i> ), Green-throated carib ( <i>Eulampis holosericeus</i> ), Chicken ( <i>Gallus gallus domesticus</i> ), Common ground dove ( <i>Columbina passerina</i> ). | This survey camera traps data |
| <i>Raccoon</i>            | Detections of northern raccoons                                                                                                                                                                                                                                                                                                                                                                                                                                                                                                                                                                        | This survey camera traps data |
| <i>Mongoose</i>           | Detections of small Indian mongooses                                                                                                                                                                                                                                                                                                                                                                                                                                                                                                                                                                   | This survey camera traps data |
| <i>Cat</i>                | Detections of domestic cats                                                                                                                                                                                                                                                                                                                                                                                                                                                                                                                                                                            | This survey camera traps data |
| <i>Dog</i>                | Detections of domestic dogs                                                                                                                                                                                                                                                                                                                                                                                                                                                                                                                                                                            | This survey camera traps data |
| <i>Rodents</i>            | Combined detections of all rodent species                                                                                                                                                                                                                                                                                                                                                                                                                                                                                                                                                              | This survey camera traps data |
| <i>Humans</i>             | Detections of humans                                                                                                                                                                                                                                                                                                                                                                                                                                                                                                                                                                                   | This survey camera traps data |

### *Occupancy and detection models.*

|                         |                                                      |                                    |
|-------------------------|------------------------------------------------------|------------------------------------|
| <i>Forest cover</i>     | Forest cover categories as described in Table 2      | Map of Guadeloupe forests          |
| <i>Forest structure</i> | Visual estimate on each camera-trap survey locations | These camera-trap survey locations |
| <i>Elevation</i>        | Elevation measured at each site                      | GPS Garmin Dakota 20               |
| <i>Temperature</i>      | Daily temperature measured at each site              | This survey camera traps data      |
| <i>Canopy openness</i>  | Visual estimate on each camera-trap survey locations | These camera-trap survey locations |

**Table S2.** Land cover categories used in this study.

| Categories                 | Description                                                                                                                                                           |
|----------------------------|-----------------------------------------------------------------------------------------------------------------------------------------------------------------------|
| <i>Tropical rainforest</i> | Montane rainforests, submontane rainforests                                                                                                                           |
| <i>Flooded forest</i>      | Swamp forest<br>Mangrove                                                                                                                                              |
| <i>Dry forest</i>          | Semi-deciduous forests<br>Semi-deciduous forests on limestone ground<br>Seasonal evergreen forests<br>Formation with predominant edaphic determinism, rocky coastline |

**Table S3:** Full table of abundance and detection models for the Bridled Quail-Dove and the Zenaida Dove in Guadeloupe forests. Abundance ( $\lambda$ ) was modelled according to temperature (temp), elevation, canopy openness (co) or forest types (forest), and the probability of detection (p) was modelled according to forest structure (fs) and temperature (temp).

| Models                    |                                             | AICc          | $\Delta$ AICc | Weight      | logLik        | d.f.        |
|---------------------------|---------------------------------------------|---------------|---------------|-------------|---------------|-------------|
| <b>Bridled Quail-Dove</b> |                                             |               |               |             |               |             |
| <b>M1</b>                 | <b>p(.),<math>\lambda</math>(temp)</b>      | <b>146.83</b> | <b>0.00</b>   | <b>0.48</b> | <b>-69.82</b> | <b>3.00</b> |
| M2                        | p(temp), $\lambda$ (temp)                   | 149.42        | 2.59          | 0.13        | -69.66        | 4.00        |
| M3                        | p(fs), $\lambda$ (temp)                     | 149.44        | 2.61          | 0.13        | -69.67        | 4.00        |
| M4                        | p(.), $\lambda$ (forest+temp)               | 151.03        | 4.20          | 0.06        | -68.85        | 5.00        |
| M5                        | p(fs+temp), $\lambda$ (temp)                | 152.45        | 5.62          | 0.03        | -69.56        | 5.00        |
| M6                        | p(.), $\lambda$ (forest)                    | 152.66        | 5.83          | 0.03        | -71.28        | 4.00        |
| M7                        | p(.), $\lambda$ (elevation)                 | 152.97        | 6.14          | 0.02        | -72.88        | 3.00        |
| M8                        | p(fs), $\lambda$ (forest+temp)              | 153.68        | 6.85          | 0.02        | -68.37        | 6.00        |
| M9                        | p(.), $\lambda$ (forest+co)                 | 153.89        | 7.06          | 0.01        | -70.28        | 5.00        |
| M10                       | p(.), $\lambda$ (co)                        | 154.16        | 7.33          | 0.01        | -73.48        | 3.00        |
| M11                       | p(temp), $\lambda$ (forest+temp)            | 154.41        | 7.58          | 0.01        | -68.73        | 6.00        |
| M12                       | p(temp), $\lambda$ (co)                     | 154.63        | 7.80          | 0.01        | -72.26        | 4.00        |
| M13                       | p(temp), $\lambda$ (forest)                 | 154.96        | 8.13          | 0.01        | -70.82        | 5.00        |
| M14                       | p(temp), $\lambda$ (elevation)              | 155.44        | 8.61          | 0.01        | -72.67        | 4.00        |
| M15                       | p(fs), $\lambda$ (forest)                   | 155.51        | 8.68          | 0.01        | -71.09        | 5.00        |
| M16                       | p(.), $\lambda$ (forest+elevation)          | 155.54        | 8.71          | 0.01        | -71.10        | 5.00        |
| M17                       | p(fs), $\lambda$ (elevation)                | 155.85        | 9.02          | 0.01        | -72.87        | 4.00        |
| M18                       | p(temp), $\lambda$ (forest+co)              | 156.54        | 9.71          | 0.00        | -69.80        | 6.00        |
| M19                       | p(fs), $\lambda$ (co)                       | 157.06        | 10.23         | 0.00        | -73.48        | 4.00        |
| M20                       | p(fs), $\lambda$ (forest+co)                | 157.17        | 10.34         | 0.00        | -70.11        | 6.00        |
| M21                       | p(.), $\lambda$ (forest+elevation+co)       | 157.21        | 10.38         | 0.00        | -70.13        | 6.00        |
| M22                       | p(fs+temp), $\lambda$ (co)                  | 157.34        | 10.51         | 0.00        | -72.01        | 5.00        |
| M23                       | p(fs+temp), $\lambda$ (forest)              | 157.62        | 10.79         | 0.00        | -70.34        | 6.00        |
| M24                       | p(fs+temp), $\lambda$ (forest+temp)         | 157.66        | 10.83         | 0.00        | -68.33        | 7.00        |
| M25                       | p(temp), $\lambda$ (.)                      | 158.00        | 11.17         | 0.00        | -75.40        | 3.00        |
| M26                       | p(temp), $\lambda$ (forest+elevation)       | 158.53        | 11.70         | 0.00        | -70.80        | 6.00        |
| M27                       | p(fs+temp), $\lambda$ (elevation)           | 158.57        | 11.74         | 0.00        | -72.62        | 5.00        |
| M28                       | p(fs), $\lambda$ (forest+elevation)         | 158.70        | 11.87         | 0.00        | -70.88        | 6.00        |
| M29                       | p(.), $\lambda$ (.)                         | 159.50        | 12.67         | 0.00        | -77.46        | 2.00        |
| M30                       | p(fs+temp), $\lambda$ (forest+co)           | 159.73        | 12.89         | 0.00        | -69.36        | 7.00        |
| M31                       | p(temp), $\lambda$ (forest+elevation+co)    | 160.59        | 13.76         | 0.00        | -69.79        | 7.00        |
| M32                       | p(fs), $\lambda$ (forest+elevation+co)      | 160.85        | 14.02         | 0.00        | -69.93        | 7.00        |
| M33                       | p(fs+temp), $\lambda$ (.)                   | 160.91        | 14.08         | 0.00        | -75.40        | 4.00        |
| M34                       | p(fs+temp), $\lambda$ (forest+elevation)    | 161.66        | 14.83         | 0.00        | -70.33        | 7.00        |
| M35                       | p(fs), $\lambda$ (.)                        | 161.69        | 14.86         | 0.00        | -77.25        | 3.00        |
| M36                       | p(fs+temp), $\lambda$ (forest+elevation+co) | 164.32        | 17.49         | 0.00        | -69.36        | 8.00        |
| <b>Zenaida Dove</b>       |                                             |               |               |             |               |             |
| <b>M1</b>                 | <b>p(.),<math>\lambda</math>(forest)</b>    | <b>129.96</b> | <b>0.00</b>   | <b>0.21</b> | <b>-59.93</b> | <b>4</b>    |

|           |                                             |               |             |             |               |          |
|-----------|---------------------------------------------|---------------|-------------|-------------|---------------|----------|
| <b>M2</b> | <b>p(.),<math>\lambda</math>(forest+co)</b> | <b>131.06</b> | <b>1.10</b> | <b>0.12</b> | <b>-58.86</b> | <b>5</b> |
| <b>M3</b> | <b>p(.),<math>\lambda</math>(co)</b>        | <b>131.17</b> | <b>1.21</b> | <b>0.11</b> | <b>-61.98</b> | <b>3</b> |
| M4        | p(.), $\lambda$ (elevation)                 | 132.14        | 2.18        | 0.07        | -62.47        | 3        |
| M5        | p(temp), $\lambda$ (forest)                 | 132.48        | 2.53        | 0.06        | -59.58        | 5        |
| M6        | p(.), $\lambda$ (forest+elevation)          | 133.00        | 3.05        | 0.04        | -59.84        | 5        |
| M7        | p(.), $\lambda$ (forest+temp)               | 133.12        | 3.16        | 0.04        | -59.89        | 5        |
| M8        | p(fs), $\lambda$ (forest)                   | 133.16        | 3.20        | 0.04        | -59.91        | 5        |
| M9        | p(temp), $\lambda$ (co)                     | 133.42        | 3.46        | 0.04        | -61.66        | 4        |
| M10       | p(fs), $\lambda$ (co)                       | 133.53        | 3.57        | 0.03        | -61.71        | 4        |
| M11       | p(.), $\lambda$ (temp)                      | 133.94        | 3.98        | 0.03        | -63.37        | 3        |
| M12       | p(temp), $\lambda$ (forest+co)              | 134.11        | 4.15        | 0.03        | -58.58        | 6        |
| M13       | p(.), $\lambda$ (forest+elevation+co)       | 134.23        | 4.27        | 0.02        | -58.64        | 6        |
| M14       | p(temp), $\lambda$ (elevation)              | 134.56        | 4.60        | 0.02        | -62.23        | 4        |
| M15       | p(fs), $\lambda$ (forest+co)                | 134.63        | 4.67        | 0.02        | -58.85        | 6        |
| M16       | p(fs), $\lambda$ (elevation)                | 135.02        | 5.06        | 0.02        | -62.46        | 4        |
| M17       | p(fs+temp), $\lambda$ (co)                  | 135.45        | 5.50        | 0.01        | -61.06        | 5        |
| M18       | p(temp), $\lambda$ (forest+elevation)       | 135.73        | 5.77        | 0.01        | -59.39        | 6        |
| M19       | p(fs+temp), $\lambda$ (forest)              | 135.82        | 5.86        | 0.01        | -59.44        | 6        |
| M20       | p(temp), $\lambda$ (forest+temp)            | 136.09        | 6.13        | 0.01        | -59.58        | 6        |
| M21       | p(temp), $\lambda$ (temp)                   | 136.42        | 6.47        | 0.01        | -63.16        | 4        |
| M22       | p(fs), $\lambda$ (temp)                     | 136.48        | 6.52        | 0.01        | -63.19        | 4        |
| M23       | p(fs), $\lambda$ (forest+elevation)         | 136.61        | 6.65        | 0.01        | -59.84        | 6        |
| M24       | p(fs), $\lambda$ (forest+temp)              | 136.64        | 6.68        | 0.01        | -59.85        | 6        |
| M25       | p(temp), $\lambda$ (forest+elevation+co)    | 137.51        | 7.55        | 0.00        | -58.25        | 7        |
| M26       | p(fs+temp), $\lambda$ (elevation)           | 137.59        | 7.64        | 0.00        | -62.13        | 5        |
| M27       | p(fs+temp), $\lambda$ (forest+co)           | 137.89        | 7.93        | 0.00        | -58.44        | 7        |
| M28       | p(fs), $\lambda$ (forest+elevation+co)      | 138.29        | 8.33        | 0.00        | -58.64        | 7        |
| M29       | p(fs+temp), $\lambda$ (temp)                | 138.99        | 9.03        | 0.00        | -62.83        | 5        |
| M30       | p(.), $\lambda$ (.)                         | 139.29        | 9.34        | 0.00        | -67.36        | 2        |
| M31       | p(fs+temp), $\lambda$ (forest+elevation)    | 139.66        | 9.70        | 0.00        | -59.33        | 7        |
| M32       | p(fs+temp), $\lambda$ (forest+temp)         | 139.84        | 9.88        | 0.00        | -59.42        | 7        |
| M33       | p(temp), $\lambda$ (.)                      | 140.09        | 10.13       | 0.00        | -66.44        | 3        |
| M34       | p(fs), $\lambda$ (.)                        | 141.62        | 11.66       | 0.00        | -67.21        | 3        |
| M35       | p(fs+temp), $\lambda$ (forest+elevation+co) | 141.98        | 12.02       | 0.00        | -58.19        | 8        |
| M36       | p(fs+temp), $\lambda$ (.)                   | 142.99        | 13.03       | 0.00        | -66.44        | 4        |

Competitive models are highlighted in bold characters. Mean dispersion parameters ( $\hat{c}$ ) obtained using MacKenzie and Bailey's goodness-of-fit test for best models were:  $\hat{c}_{\text{Bridled Quail-Dove M1}} = 0.98$ ;  $\hat{c}_{\text{Zenaida Dove M2}} = 0.66$ ;  $\hat{c}_{\text{Zenaida Dove M6}} = 0.68$ ;  $\hat{c}_{\text{Zenaida Dove M3}} = 0.66$ .
